# Supplementary material
Source: Springer Nature journal article supplement (https://www.springermedizin.de/resource/supplementary/13048_2009_14_MOESM1_ESM.pdf/9664748)

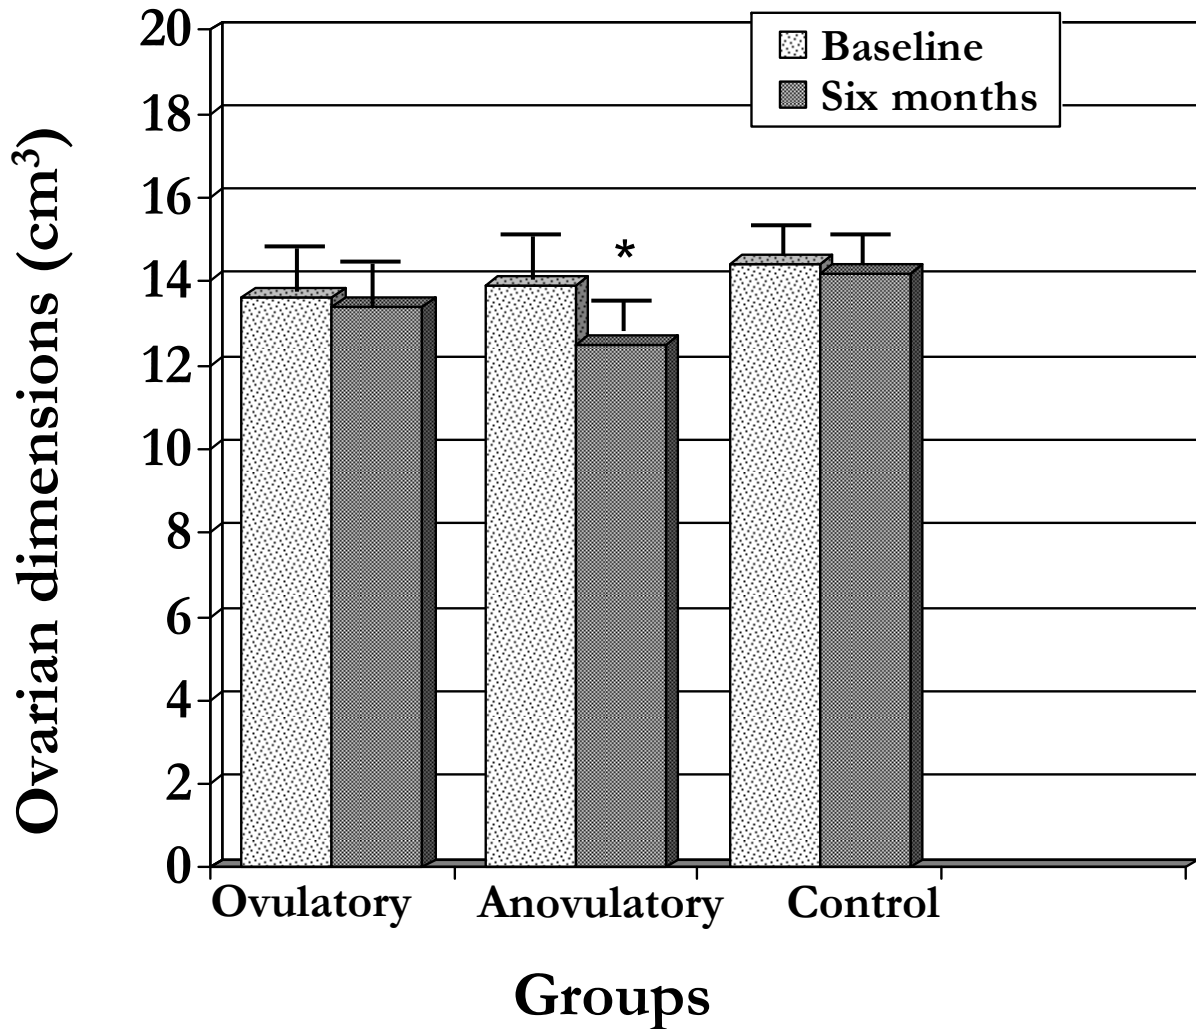

Supplement: MOESM1 [file 9664748]
